# Supplementary material for: Maternal anxiety or depression and cognitive ability in young male offspring: A population-based cohort study using cognitive test scores from the Danish Conscription Board Examination
Source: Research Square preprint supplement (doi:10.21203/rs.3.rs-6252560/v1), 2025-08-25
Supplement: Supplementary file 1 [file feac768dc897218a8756bec8.docx]

# **Maternal anxiety or depression and cognitive ability in young male offspring: A population-based cohort study using cognitive test scores from the Danish Conscription Board Examination**

Tanja Gram Petersen*a, Rikke Wesselhoeftb,c,d, Gunhild Tidemann Okholme,f, Trine Munk-Olsenb,c, Merete Oslere,g, Lars Meinertz Bygh, Veerle Berginki, Kirstine Davidsenc,j, Mette Bliddala,d

Affiliation

1. Research Unit OPEN, Department of Clinical Research, University of Southern Denmark, Odense, Denmark
2. Research Unit of Child and Adolescent Psychiatry, Department of Clinical Research, University of Southern Denmark, Odense, Denmark
3. Department of Child and Adolescent Psychiatry, Mental Health Services in the Region of Southern Denmark, Odense, Denmark
4. Clinical Pharmacology, Pharmacy and Environmental Medicine, Department of Public Health, University of Southern Denmark, Odense, Denmark
5. Center for Clinical Research and Prevention, Bispebjerg and Frederiksberg Hospitals The Capital Region, Frederiksberg, Denmark
6. The National Institute of Public Health, University of Southern Denmark, Copenhagen, Denmark
7. Section of Epidemiology, Department of Public Health, University of Copenhagen, Copenhagen, Denmark
8. School of Medicine and Public Health, University of Newcastle, Newcastle, NSW, Australia
9. Department of Psychiatry, Icahn School of Medicine at Mount Sinai, New York, USA
10. Department of Psychology, University of Southern Denmark, Odense, Denmark

Corresponding author: Tanja Gram Petersen, tanja.gram.petersen@rsyd.dk

Journal: Social Psychiatry and Psychiatric Epidemiology

# **Online Resource**

**Table 2. Baseline characteristics of the study population – proportions adjusted with IPW**

| **Characteristics** | **Timing of incident diagnosis of maternal emotional disorder** | | | | | |
| --- | --- | --- | --- | --- | --- | --- |
| **No hospital contact**  **N=109,428** | **Before pregnancy**  **N=1233** | **During pregnancy**  **N=251** | **First year after birth**  **N=480** | **1-5 years after birth**  **N=2345** | **6-17 years after birth**  **N=5650** |
| **%** | **%** | **%** | **%** | **%** | **%** |
| Birth year |  |  |  |  |  |  |
| 1996-1998 | 92.1 | 0.9 | 0.2 | 0.4 | 1.9 | 4.6 |
| 1999-2001 | 91.6 | 1.1 | 0.3 | 0.4 | 2.0 | 4.6 |
| Primiparity | 41.6 | 42.1 | 40.5 | 42.8 | 42.8 | 42.0 |
| Maternal age, |  |  |  |  |  |  |
| Median [Q1;Q3] | 29.0 [25.0;32.0] | 29.0 [25.0;32.0] | 29.0 [26.0;32.0] | 29.0 [25.0;32.0] | 28.0 [25.0;32.0] | 28.0 [25.0;32.0] |
| ≤20 | 3.9 | 5.9 | 4.4 | 4.4 | 4.3 | 4.5 |
| 21-25 | 21.2 | 22.4 | 19.7 | 21.1 | 23.4 | 21.6 |
| 26-30 | 41.3 | 34.8 | 40.1 | 38.4 | 39.2 | 41.1 |
| 31-35 | 26.3 | 28.5 | 27.8 | 29.6 | 26.0 | 26.2 |
| 36-40 | 6.8 | 7.8 | 7.6 | 5.9 | 6.9 | 6.4 |
| ≥41 | 0.6 | 0.5 | 0.4 | 0.6 | 0.3 | 0.3 |
| Maternal cohabitation status: not living with a partner/unmarried | 9.4 | 13.0 | 11.0 | 9.6 | 10.8 | 10.2 |
| Family income |  |  |  |  |  |  |
| Low tertile | 33.4 | 39.1 | 35.0 | 34.5 | 35.4 | 35.0 |
| Midle tertile | 34.1 | 32.9 | 32.7 | 34.5 | 34.3 | 34.4 |
| High tertile | 32.5 | 27.9 | 32.3 | 31.1 | 30.3 | 30.5 |
| Maternal highest educational degree |  |  |  |  |  |  |
| Lower secondary | 22.8 | 29.9 | 25.4 | 23.4 | 24.5 | 24.3 |
| Upper secondary | 49.5 | 46.2 | 47.3 | 48.2 | 49.3 | 50.0 |
| Post-secondary | 27.7 | 23.9 | 27.2 | 28.4 | 26.2 | 25.7 |
| Maternal occupation: Unemployed/receiving  social benefits |  |  |  |  |  |  |
| CCI |  |  |  |  |  |  |
| 0 | 98.2 | 97.3 | 98.3 | 98.4 | 98.1 | 98.0 |
| 1 | 1.3 | 1.9 | . | . | 1.3 | 1.5 |
| ≥2 | 0.5 | 0.8 | . | . | 0.6 | 0.5 |
| Other psychiatric historic: yes | 0.7 | 9.0 | 2.6 | 1.3 | 1.2 | 1.0 |

SMD: Standardized mean differences, IPW: Inverse probability weighting, CCI: Charlson Comorbidity Index

*row percentages

**Table 3. Cognitive test score (Børge Priens Prøve) according to maternal emotional disorders – stratified by birth cohort**

|  | **Børge Priens Prøve score** | | | |
| --- | --- | --- | --- | --- |
| **Timing of incident diagnosis of maternal emotional disorder** | **No.** | **Mean score**  **(95% CI)** | **Crude mean difference per SD** | **Adjusted mean difference per SD (95% CI)** |
| *Birth year 1996-1998* | | | | |
| No hospital contact | 65308 | 40.9 (40.8;41.0) | 0 (ref) | 0 (ref) |
| Before pregnancy | 532 | 39.6 (38.9;40.4) | -0.15 | -0.06 (-0.15;0.04) |
| During pregnancy | 137 | 37.5 (35.9;39.0) | -0.39 | **-0.31 (-0.50;-0.11)** |
| First year after birth | 254 | 38.5 (37.4;39.6) | -0.28 | **-0.25 (-0.38;-0.13)** |
| 1-5 years after birth | 1311 | 38.7 (38.2;39.2) | -0.26 | **-0.12 (-0.18;-0.06)** |
| 6-17 years after birth | 3298 | 38.4 (38.1;38.7) | -0.29 | **-0.10 (-0.14;-0.06)** |
| *Birth year 1999-2001* | | | | |
| No hospital contact | 44120 | 40.8 (40.7;40.9) | 0 (ref) | 0 (ref) |
| Before pregnancy | 701 | 38.7 (38.0;39.3) | -0.25 | **-0.14 (-0.23;-0.06)** |
| During pregnancy | 114 | 38.9 (37.4;40.4) | -0.21 | -0.13 (-0.33;0.07) |
| First year after birth | 226 | 40.1 (38.9;41.3) | -0.08 | -0.01 (-0.15;0.12) |
| 1-5 years after birth | 1034 | 38.6 (38.1;39.2) | -0.25 | **-0.10 (-0.17;-0.03)** |
| 6-17 years after birth | 2352 | 38.2 (37.9;38.6) | -0.29 | **-0.11 (-0.16;-0.07)** |

SD: standard deviation, No.: number, 95% CI: 95% confidence interval

Mean differences in SD was estimated using linear regression. The adjusted model included an Inverse probability weight (IPW). The IPW was computed as the inverse of being exposed given maternal age (included as restricted cubic splines), cohabitation status, primiparity, family income, highest maternal educational degree, maternal occupational status, maternal Charlson Comorbidity Index, and other maternal psychiatric history.

**Table 4. Cognitive test score (Børge Priens Prøve) according to maternal emotional disorders – stratified by parity**

|  | **Børge Priens Prøve score** | | | |
| --- | --- | --- | --- | --- |
| **Timing of incident diagnosis of maternal emotional disorder** | **No.** | **Mean score**  **(95% CI)** | **Crude mean difference per SD** | **Adjusted mean difference per SD (95% CI)** |
| *Primiparous mothers* | | | | |
| No hospital contact | 45381 | 41.5 (41.4;41.6) | 0 (ref) | 0 (ref) |
| Before pregnancy | 517 | 39.5 (38.7;40.2) | -0.23 | **-0.13 (-0.24;-0.02)** |
| During pregnancy | 101 | 38.7 (37.1;40.4) | -0.32 | **-0.26 (-0.48;-0.04)** |
| First year after birth | 215 | 39.4 (38.1;40.6) | -0.25 | **-0.23 (-0.38;-0.08)** |
| 1-5 years after birth | 1059 | 39.5 (38.9;40.0) | -0.24 | **-0.08 (-0.15;-0.02)** |
| 6-17 years after birth | 2374 | 39.3 (38.9;39.6) | -0.26 | **-0.09 (-0.14;-0.05)** |
| *Multiparous mothers* | | | | |
| No hospital contact | 64047 | 40.4 (40.3;40.5) | 0 (ref) | 0 (ref) |
| Before pregnancy | 716 | 38.8 (38.1;39.4) | -0.19 | -0.07 (-0.15;0.02) |
| During pregnancy | 150 | 37.8 (36.3;39.2) | -0.30 | **-0.21 (-0.40;-0.02)** |
| First year after birth | 265 | 39.1 (38.1;40.2) | -0.14 | -0.05 (-0.17;0.06) |
| 1-5 years after birth | 1286 | 38.0 (37.5;38.5) | -0.28 | **-0.13 (-0.20;-0.07)** |
| 6-17 years after birth | 3276 | 37.6 (37.3;38.0) | -0.32 | **-0.11 (-0.15;-0.07)** |

SD: standard deviation, No.: number, 95% CI: 95% confidence interval

Mean differences in SD was estimated using linear regression. The adjusted model included an Inverse probability weight (IPW). The IPW was computed as the inverse of being exposed given maternal age (included as restricted cubic splines), cohabitation status, birth year of the child, family income, highest maternal educational degree, maternal occupational status, maternal Charlson Comorbidity Index, and other maternal psychiatric history.

**Table 5. Cognitive test score (Børge Priens Prøve) according to maternal emotional disorders – additionally adjusted for paternal psychiatric diagnoses**

|  | **Børge Priens Prøve score** | | |
| --- | --- | --- | --- |
| **Timing of incident diagnosis of maternal emotional disorder** | **No.** | **Mean score**  **(95% CI)** | **Adjusted* mean difference per SD (95% CI)** |
| ***Entire population*** | | | |
| No hospital contact | 106112 | 41.0 (40.9;41.0) | 0 (ref) |
| Before pregnancy | 1148 | 39.2 (38.7;39.7) | **-0.12 (-0.18;-0.05)** |
| During pregnancy | 236 | 38.0 (36.9;39.2) | **-0.23 (-0.38;-0.09)** |
| First year after birth | 459 | 39.2 (38.4;40.0) | **-0.17 (-0.26;-0.07)** |
| 1-5 years after birth | 2235 | 38.8 (38.4;39.2) | **-0.11 (-0.16;-0.06)** |
| 6-17 years after birth | 5336 | 38.5 (38.3;38.8) | **-0.10 (-0.13;-0.07)** |

SD: Standard deviation, No.: Number, 95% CI: 95% Confidence interval

Mean differences in SD was estimated using linear regression. The adjusted model included an Inverse probability weight (IPW). The IPW was computed as the inverse of being exposed given maternal age (included as restricted cubic splines), cohabitation status, primiparity, birth year of the child, family income, highest maternal educational degree, maternal occupational status, maternal Charlson Comorbidity Index, and other maternal psychiatric history. The estimates were additionally adjusted for paternal emotional disorders and other paternal psychiatric history.

**Table 6. Cognitive test score (Børge Priens Prøve) according to maternal emotional disorders - assessed by either incident hospital diagnosis or filled prescriptions (whichever comes first)**

|  | **Børge Priens Prøve score** | | | |
| --- | --- | --- | --- | --- |
| **Timing of incident maternal emotional disorder diagnosis/filled prescription** | **No.** | **Mean score**  **(95% CI)** | **Crude mean difference per SD** | **Adjusted mean difference per SD (95% CI)** |
| ***Entire population*** | | | | |
| No hospital contact | 75833 | 41.4 (41.4;41.5) | 0 (ref) | 0 (ref) |
| Before pregnancy | 6916 | 39.4 (39.2;39.6) | **-0.23 (-0.26;-0.20)** | **-0.11 (-0.14;-0.08)** |
| During pregnancy | 667 | 39.3 (38.6;40.0) | **-0.24 (-0.32;-0.16)** | **-0.12 (-0.21;-0.04)** |
| First year after birth | 1780 | 39.2 (38.8;39.6) | **-0.26 (-0.30;-0.21)** | **-0.13 (-0.18;-0.08)** |
| 1-5 years after birth | 12788 | 39.3 (39.1;39.4) | **-0.25 (-0.27;-0.23)** | **-0.11 (-0.13;-0.09)** |
| 6-17 years after birth | 21403 | 39.4 (39.3;39.6) | **-0.23 (-0.24;-0.21)** | **-0.09 (-0.11;-0.08)** |

SD: Standard deviation, No.: Number, 95% CI: 95% Confidence interval.

Mean differences in SD was estimated using linear regression. The adjusted model included an Inverse probability weight (IPW). The IPW was computed as the inverse of being exposed given maternal age (included as restricted cubic splines), cohabitation status, primiparity, birth year of the child, family income, highest maternal educational degree, maternal occupational status, maternal Charlson Comorbidity Index, and other maternal psychiatric history.

**Table 7. Cognitive test score (Børge Priens Prøve) according to paternal emotional disorders – additionally adjusted for maternal psychiatric diagnoses**

|  | **Børge Priens Prøve score** | | |
| --- | --- | --- | --- |
| **Timing of incident diagnosis of paternal emotional disorder** | **No.** | **Mean score**  **(95% CI)** | **Adjusted* mean difference per SD (95% CI)** |
| ***Entire population*** | | | |
| No hospital contact | 109414 | 40.9 (40.9;41.0) | 0 (ref) |
| Before pregnancy | 594 | 39.1 (38.3;39.8) | **-0.16 (-0.26;-0.07)** |
| During pregnancy | 92 | 38.6 (36.9;40.4) | -0.16 (-0.37;0.05) |
| First year after birth | 193 | 38.2 (37.0;39.3) | -0.14 (-0.28;0.00) |
| 1-5 years after birth | 1503 | 38.4 (37.9;38.8) | **-0.17 (-0.22;-0.11)** |
| 6-17 years after birth | 3730 | 38.3 (38.0;38.6) | **-0.18 (-0.22;-0.15)** |

SD: Standard deviation, No.: Number, 95% CI: 95% Confidence interval.

Mean differences in SD was estimated using linear regression. The adjusted model included an Inverse probability weight (IPW). The IPW was computed as the inverse of being exposed given paternal age (included as restricted cubic splines), cohabitation status, primiparity, birth year of the child, family income, highest paternal educational degree, paternal occupational status, paternal Charlson Comorbidity Index, and other paternal psychiatric history. The estimates were additionally adjusted for maternal emotional disorders and other maternal psychiatric history.
